# Supplementary material for: Electrically conductive polyaniline sensitized defective-TiO2for improved visible light photocatalytic and photoelectrochemical performance: a synergistic effect
Source: Royal Society of Chemistry journal article supplement (doi:10.1039/c5nj01127b), 2015-01-01
Supplement: c5nj01127b1.pdf [file c5nj01127b1.pdf]

## Supporting Information

### **Electrically conductive polyaniline sensitized defective-TiO<sub>2</sub> for improved visible light photocatalytic and photoelectrochemical performance: A synergistic effect**

Mohd Omaish Ansari,<sup>a\*</sup> Mohammad Mansoob Khan,<sup>b\*</sup> Sajid Ali Ansari,<sup>a</sup> and Moo Hwan Cho<sup>a\*</sup>

<sup>a</sup>School of Chemical Engineering, Yeungnam University, Gyeongsan-si, Gyeongbuk 712-749, South Korea, Phone: +82-53-810-2517; Fax: +82-53- 810-4631.

<sup>b</sup>Chemical Sciences, Faculty of Science, Universiti Brunei Darussalam, Jalan Tungku Link, BE 1410, Brunei Darussalam.

**XPS Spectra of *s*-Pani@*p*-TiO<sub>2</sub> and *s*-Pani@*m*-TiO<sub>2</sub> nanocomposites**

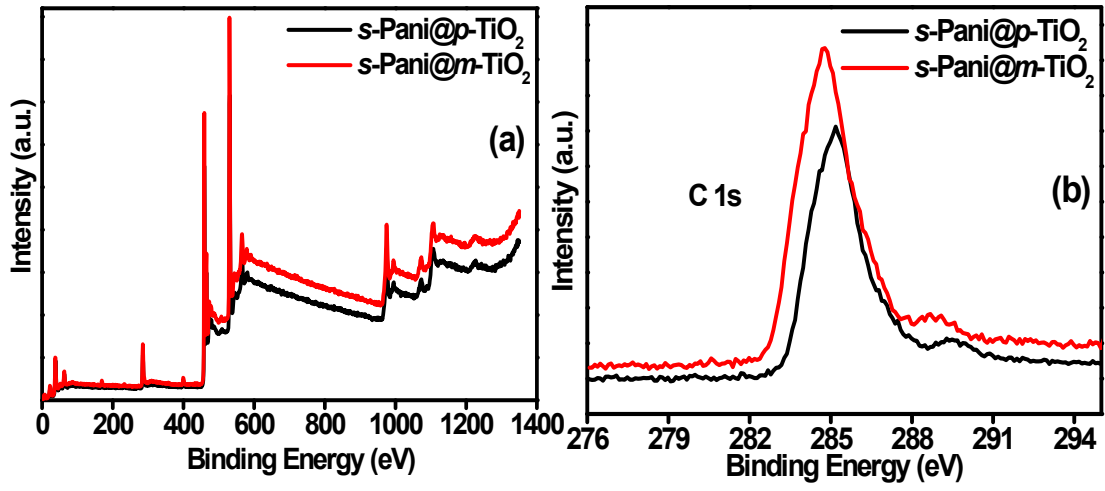

**Fig. S1.** XPS spectra of *s*-Pani@*p*-TiO<sub>2</sub> and *s*-Pani@*m*-TiO<sub>2</sub> nanocomposites for (a) survey spectra and (b) C 1s peaks.

**XPS Ti 2p and O 1s spectra of *p*-TiO<sub>2</sub> and *m*-TiO<sub>2</sub> nanoparticles**

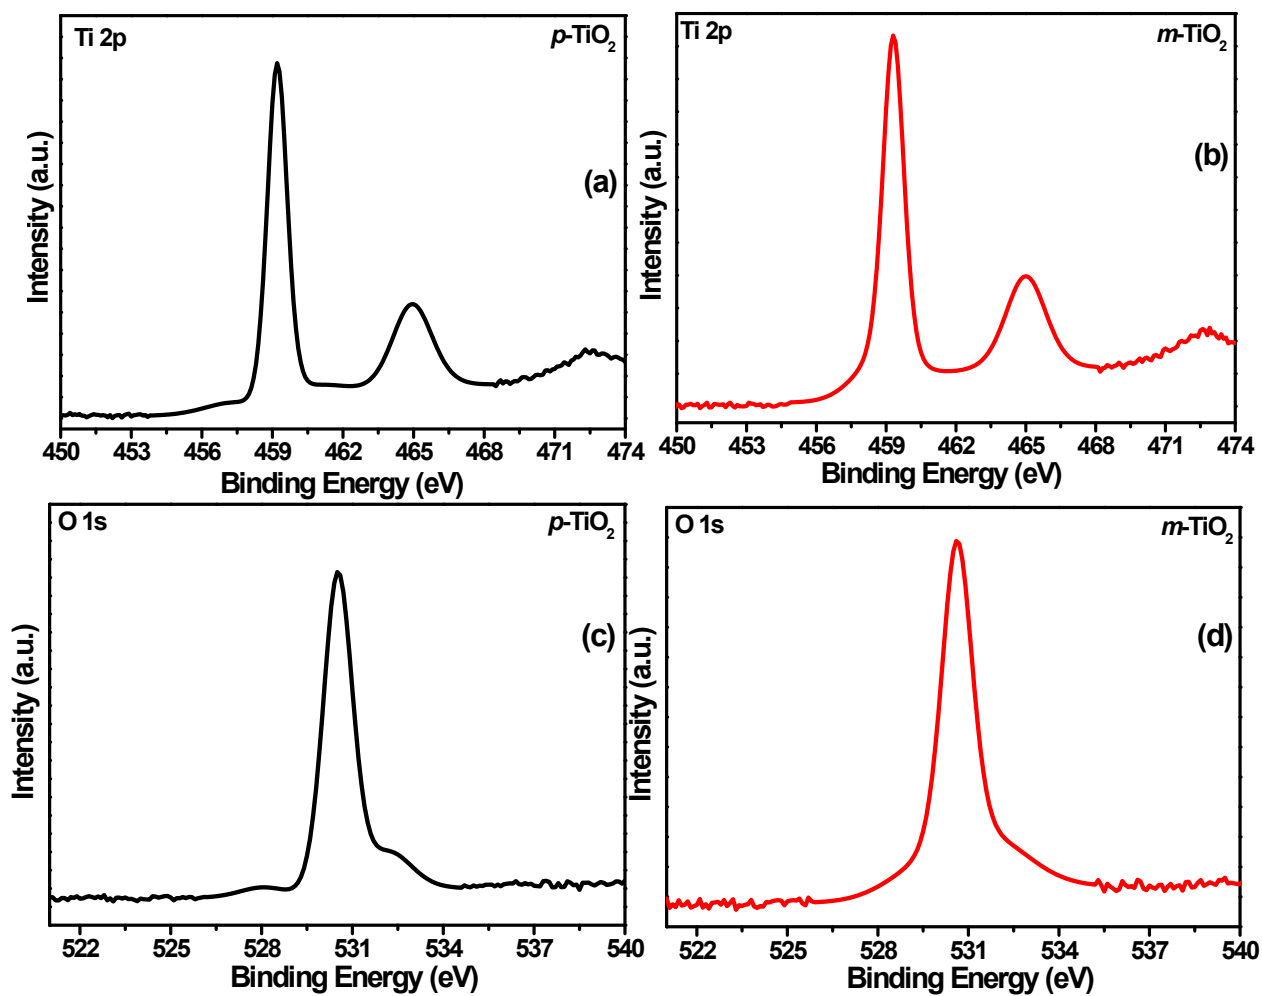

**Fig. S2.** XPS spectra of Ti 2p for *p*-TiO<sub>2</sub> (a), *m*-TiO<sub>2</sub> (b), O 1s for *p*-TiO<sub>2</sub> (c), and *m*-TiO<sub>2</sub> (d).

**UV-vis diffuse reflectance spectra of *s*-Pani@*p*-TiO<sub>2</sub> and *s*-Pani@*m*-TiO<sub>2</sub> nanocomposites**

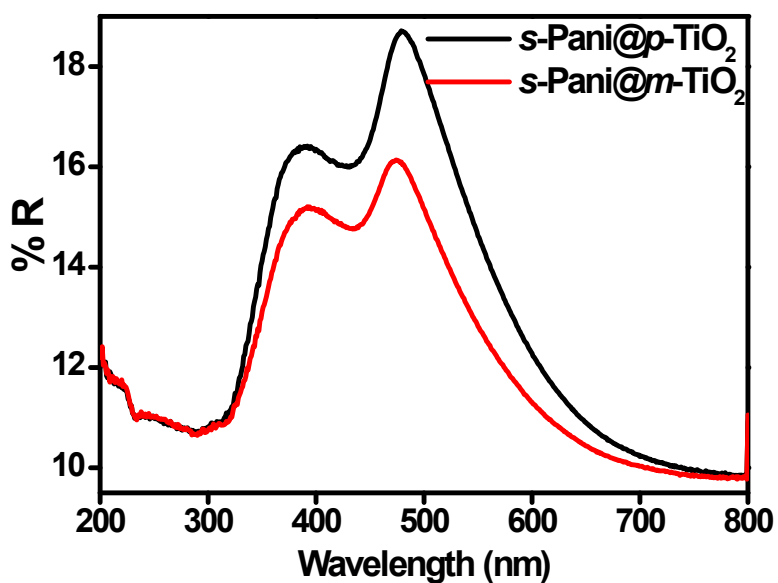

**Fig. S3.** UV-vis diffuse reflectance spectra of *s*-Pani@*p*-TiO<sub>2</sub> and *s*-Pani@*m*-TiO<sub>2</sub> nanocomposites.

**Cyclic Stability of *s*-Pani@*m*-TiO<sub>2</sub> nanocomposites**

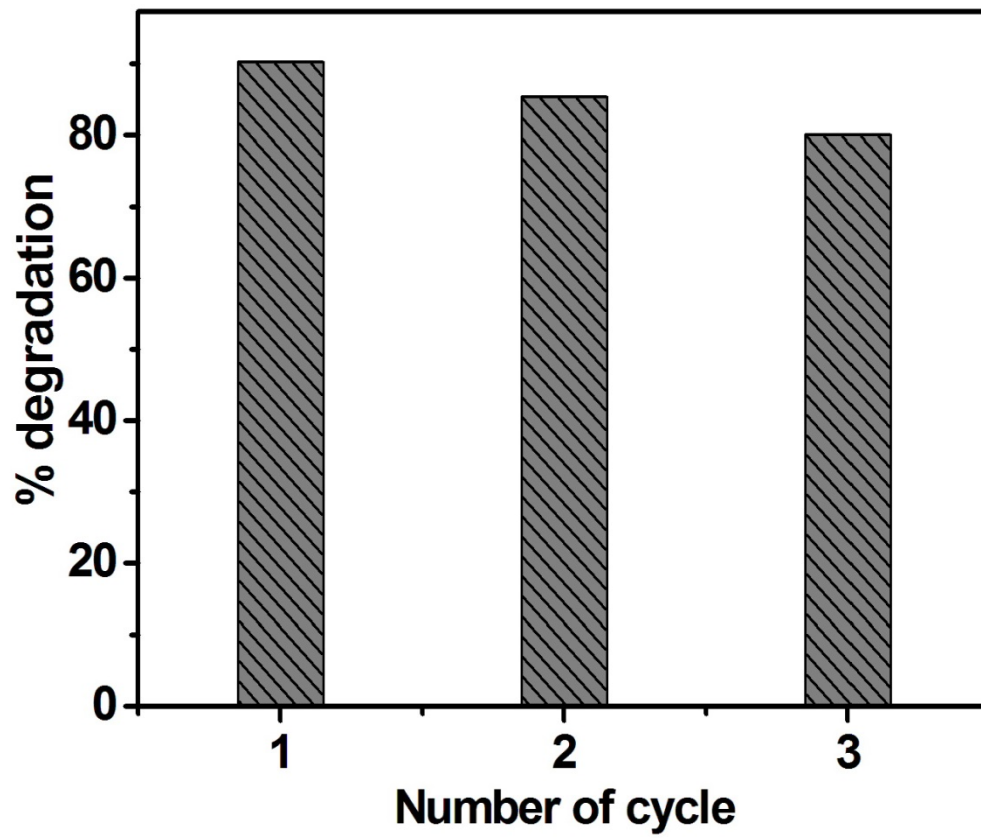

**Fig. S4.** Cyclic stability studies of *s*-Pani@*m*-TiO<sub>2</sub> nanocomposites towards the degradation of MB under visible light irradiation.
